# Supplementary material
Source: Springer Nature journal article supplement (https://www.springermedizin.de/resource/supplementary/12958_2008_473_MOESM1_ESM.pdf/9567998)

**A**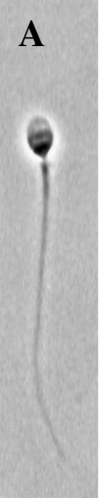**B**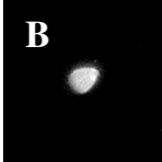**E**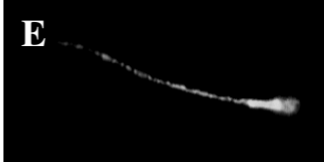**C**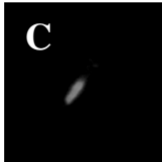**F**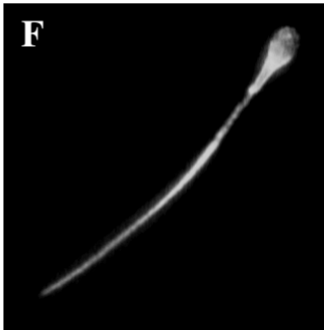**D**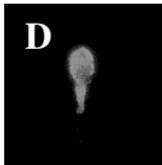

Supplement: MOESM1 [file 9567998]
